# Supplementary material for: Generation of swine movement network and analysis of efficient mitigation strategies for African swine fever virus
Source: PubMed Central journal article supplement (PMC6894757; doi:10.1371/journal.pone.0225785), 2019-12-05
Supplement: pone.0225785.s005.pdf [file pone.0225785.s005.pdf]

## Appendix A: Network Generation Algorithms

The basic outline of network generation is described in Algorithm 1.

```
input :  $N_F, PIG\_DAT, SF, P, F\_DIST, M\_MIX, K\_DAT, SHP\_DAT$   
output:  $G_F, G_P$   
// Assigns different operation types to individual farms uniformly  
// at random.  
1  $F\_TYPE \leftarrow F\_TYPE\_GEN(F\_DIST, N_F)$ ;  
// Generates a directed farm graph with weighted (shipment rate)  
// links.  
2  $G_F \leftarrow F\_GRAPH\_GEN(M\_MIX, F\_TYPE, N_F, K\_DAT, SHP\_DAT)$ ;  
// Assigns pigs to different operations based on data obtained from  
// NASS. Scales the population by a factor  $SF$ .  
3  $PIG\_LIST \leftarrow PIG\_ALLOT(PIG\_DAT, N_F, SF)$ ;  
// Generates a pig level graph.  
4  $G_P \leftarrow P\_GRAPH\_GEN(G_F, N_F, PIG\_LIST, P)$ ;
```

**Algorithm 1:** Basic outline of graph generation

In the above box,  $N_F$  is the number of farms,  $PIG\_DAT$  is the pig distribution data given in Table 4,  $SF$  is the scaling factor used to scale the pig level graph in order to make it computationally feasible in our model,  $P$  is the probability of within farm contacts between pigs,  $F\_DIST$  is the farm type distribution shown in Table 3,  $M\_MIX$  is the mixing matrix shown in Table 1,  $K\_DAT$  contains the degree centrality data from Table 2, and  $SHP\_DAT$  contains the mean and median shipment data. The farm level and pig level graphs are represented by  $G_F$  and  $G_P$  respectively. We describe

the  $F\_GRAPH\_GEN$  function in more detail in Algorithm 2.

```

input :  $M\_MIX, F\_TYPE, N_F, K\_DAT, SHP\_DAT$ 
output :  $G_F$ 
// Allocates in and out-degrees based on production types.
1  $DEG\_ALLOC \leftarrow DEG\_GEN(F\_TYPE, K\_DAT)$ ;
2 for  $SRC\_NODE \leftarrow 1$  to  $N_F$  do
    // Get the allocated (max) out-degree of source node.
3      $MAX\_KOUT = DEG\_ALLOC[SRC\_NODE, OUTDEG]$ ;
4     for  $k \leftarrow 1$  to  $MAX\_KOUT$  do
        // Randomly sample the destination type from the mixing matrix
        // distribution.
5          $DST\_TYPE \sim M\_MIX[F\_TYPE[SRC\_NODE]]$ ;
        // Find all the nodes of the given type.
6          $DST\_NODES \leftarrow \{n : n \in [1, N_F] \text{ and } F\_TYPE(n) = DST\_TYPE\}$ ;
        // Pick the destination node which has the largest in-degree
        // gap (max in-degree - current in-degree) to cover up.
7          $DST\_NODE \leftarrow n \in DST\_NODES$  that maximizes
             $(KIN(n, MAX) - KIN(n, CUR))$ ;
        // generate shipment data from log-normal distribution with
        // mean and median shipment values given in  $SHP\_DAT$ .
8          $SHP\_RATE \sim Lognormal(SHP\_DAT)$ ;
        // Create the link with generated shipment rate as weight.
9          $G_F \leftarrow G_F + EDGE(SRC\_NODE, DST\_NODE, SHP\_RATE)$ ;
10    end
11 end

```

**Algorithm 2:**  $F\_GRAPH\_GEN$

We also describe another key component of the graph generator,  $P\_GRAPH\_GEN$

in Algorithm 3, which generates the pig level network.

```

input :  $G_F, N_F, PIG\_LIST, P$ 
output :  $G_P$ 
1 for  $f \leftarrow 1$  to  $N_F$  do
  // List of pigs in the farm  $f$ .
2   $PIG\_NODES \leftarrow PIG\_LIST(f)$ ;
  // Generate Erdos-Renyi graph for list of pig nodes with edge
  // probability  $P$ .
3   $EDGES = ERDOS\_RENYI(PIG\_NODES, P)$ ;
  // Add the generated edges to the pig level graph.
4   $G_P \leftarrow G_P + EDGES$ ;
5 end
  // Normalize the edge weights to be used as probabilities.
6  $G_F^{NORM} \leftarrow G_F / MAX(G_F)$ ;
7 for each  $(F1, F2)$  pair where  $F1, F2 \in G_F$  and  $F1 \neq F2$  do
  // Probability of movement from farm  $F1$  to any other farms.
8   $P_{FROM} \leftarrow G_F^{NORM}(F1, ALL)$ ;
  // Probability of movement from any farm to farm  $F2$ .
9   $P_{TO} \leftarrow G_F^{NORM}(ALL, F2)$ ;
10 for each  $P1 \in PIG\_LIST(F1)$  do
11   for each  $P2 \in PIG\_LIST(F2)$  do
12      $r \sim Uniform(0, 1)$ ;
13     if  $r \leq P_{FROM} \times P_{TO}$  then
14        $G_P \leftarrow G_P + EDGE(P1, P2)$ ;
15     end
16   end
17 end

```

Algorithm 3:  $P\_GRAPH\_GEN$
